# Supplementary material
Source: ML conference proceedings conference paper supplement (https://openreview.net/forum?id=ywHWWuoflN)
Supplement: supplementary_material [file main-fig1.pdf › ClinPath-main/main-fig1.pdf]

Med-KG: A General-Purpose Knowledge Graph for Understanding Clinical Interactions

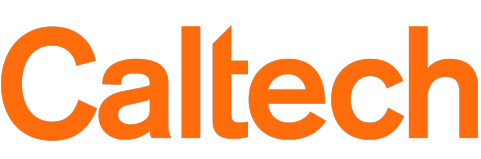

Sahithi Ankireddy, Purvi Sehgal

Bridging structured knowledge and language understanding for broad clinical insights using Knowledge Graphs & Large Language Models

Motivation

MIMIC-IV contains rich, multimodal data (e.g., notes, labs, prescriptions) that is decentralized across multiple files → knowledge graph enables structure

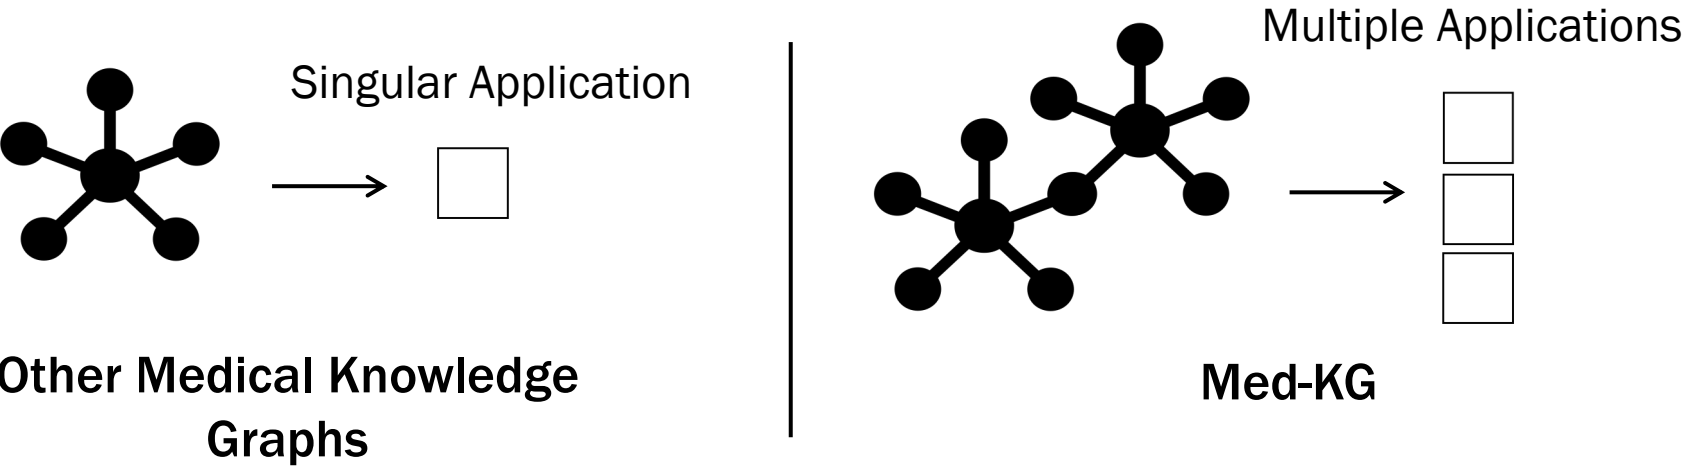

Data

Incorporating tabular, textual and image data

| MIMIC-IV                                                                                                                                                                                                                                                                                                                            | MIMIC-IV-Note                                                                                                                                                                                                                                                                                                           |
|-------------------------------------------------------------------------------------------------------------------------------------------------------------------------------------------------------------------------------------------------------------------------------------------------------------------------------------|-------------------------------------------------------------------------------------------------------------------------------------------------------------------------------------------------------------------------------------------------------------------------------------------------------------------------|
| <div><div>admissions.csv.gz</div><div>d_hcpcs.csv.gz</div><div>d_icd_diagnoses.csv.gz</div><div>d_icd_procedures.csv.gz</div><div>d_labitems.csv.gz</div><div>diagnoses_icd.csv.gz</div><div>drgcodes.csv.gz</div><div>emar.csv.gz</div><div>emar_detail.csv.gz</div><div>hcupsevents.csv.gz</div><div>labevents.csv.gz</div></div> | <div><div>microbiologyevents.csv.gz</div><div>omr.csv.gz</div><div>patients.csv.gz</div><div>pharmacy.csv.gz</div><div>poe.csv.gz</div><div>poe_detail.csv.gz</div><div>prescriptions.csv.gz</div><div>procedures_icd.csv.gz</div><div>provider.csv.gz</div><div>services.csv.gz</div><div>transfers.csv.gz</div></div> |
|                                                                                                                                                                                                                                                                                                                                     | <div><div>discharge.csv.gz</div><div>discharge_detail.csv.gz</div><div>radiology.csv.gz</div><div>radiology_detail.csv.gz</div></div>                                                                                                                                                                                   |

Method

ClinPath: Knowledge Graphs with LLM Reasoning For Understanding Clinical Interactions

1) Clin-KG Generation

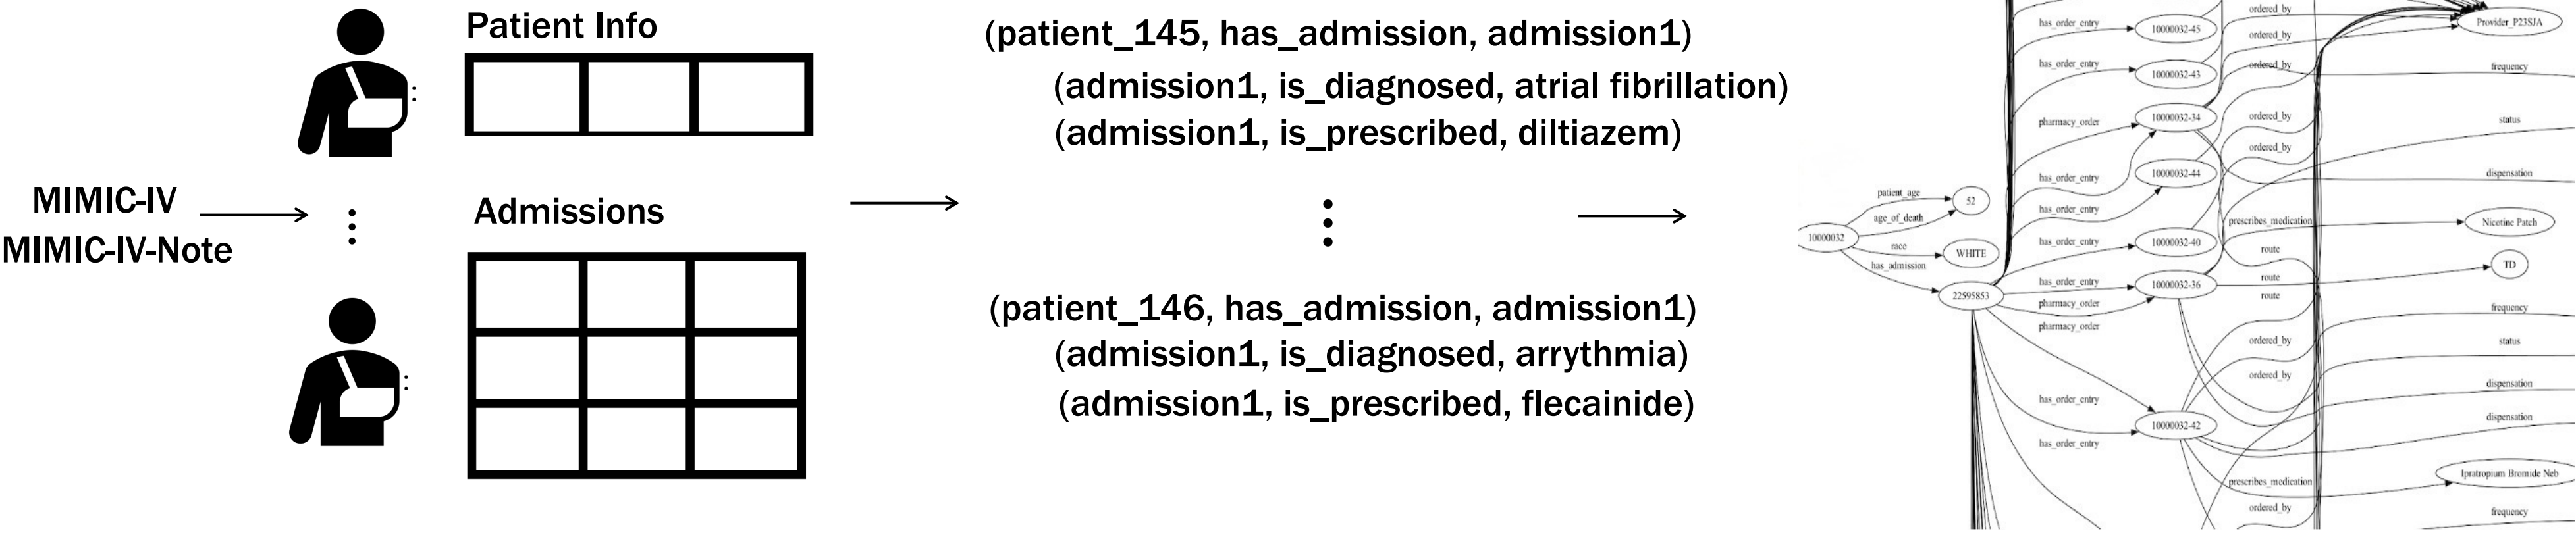

2) LLM Reasoning: Patient Similarity and Provider Behavior Analysis

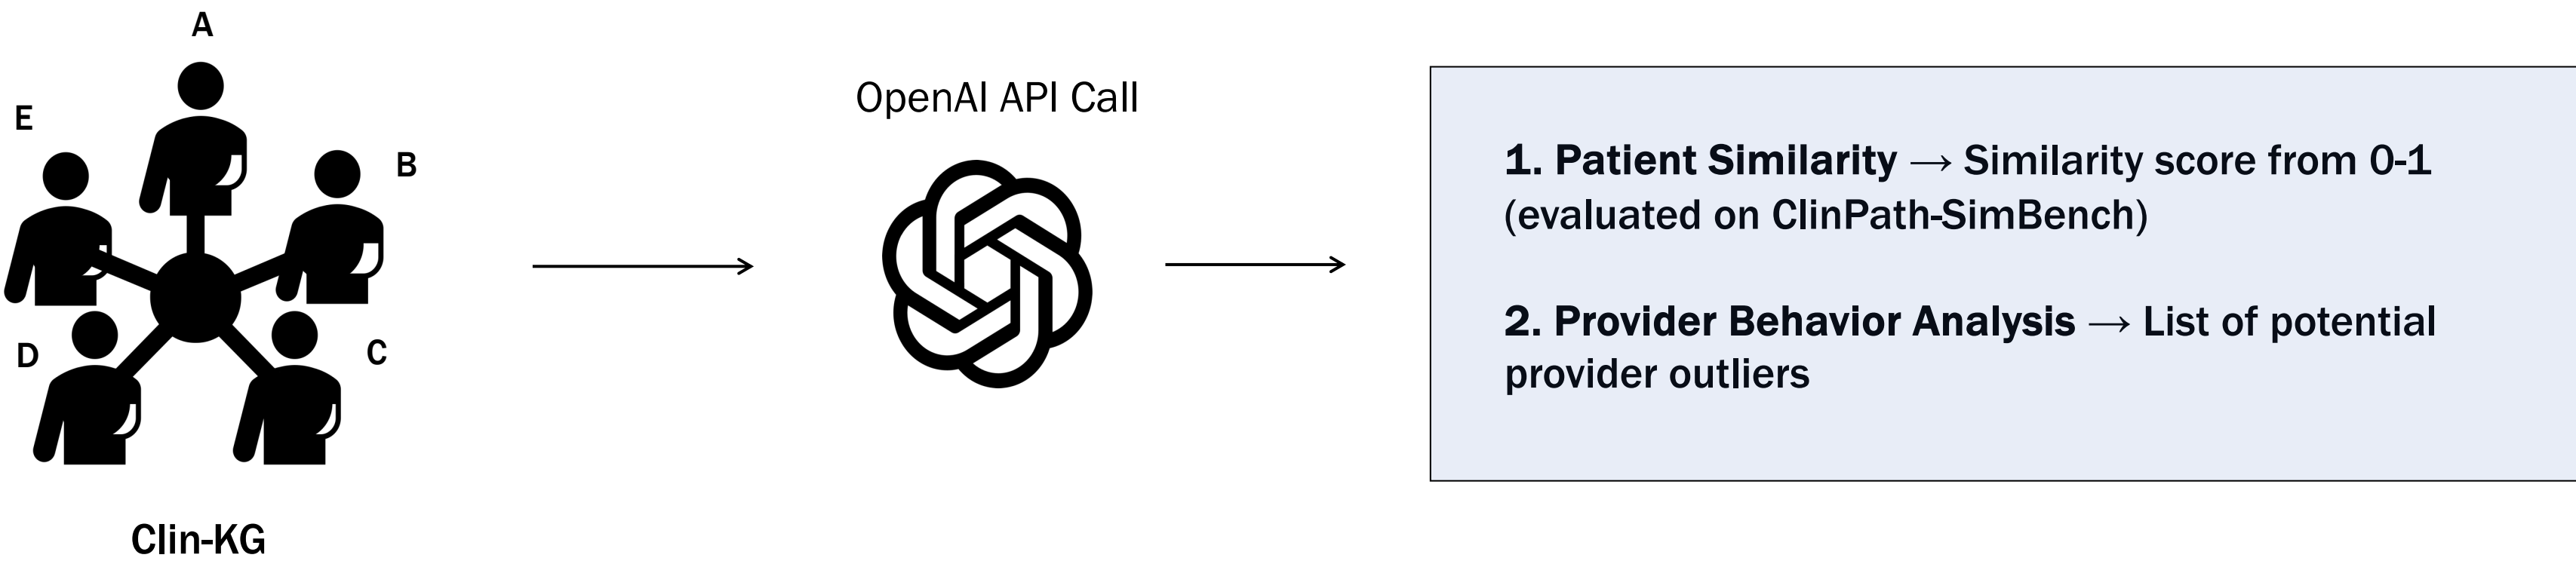

Applications

- Patient Similarity Analysis**  
How to identify similar patients to provide clinical decision-making support?  
Are there differences in treatment among similar patients?
- Provider**  
Are there anomalies in provider behavior (overprescribing, upcoding, etc.)?  
How to quantify provider success rate?
- Answer Clinical Research Questions**  
What types of physician order entries are discontinued?  
What types of admissions result in inter-hospital transfers?

Future Work

- Expand Tasks**
- More Quantitative Evaluations**
- Mental Health Data: NIMH Archive**

Acknowledgements

Thank you to Professor Adam Wierman for his support on this project through the Caltech CS 145 class.
